# Supplementary material for: Epidemiological and Economic Evaluation of Alternative On-Farm Management Scenarios for Ovine Footrot in Switzerland
Source: PubMed Central journal article supplement (PMC5432651; doi:10.3389/fvets.2017.00070), 2017-05-16
Supplement: presentation_2.pdf [file presentation_2.pdf]

## Supplementary tables

Table S1: Input parameter of the model which were constant for all scenarios: Popsize = number sheep premises, Density = mean density of sheep premises per km<sup>2</sup>, BetamaxCounty = maximum of the pert-distribution of the infection rate  $\beta$  per year, BetaminCounty = minimum of the pert-distribution of the infection rate  $\beta$  per year, BetamedCounty = median of the pert-distribution of the infection rate  $\beta$  per year, Climate factor = climatic factor, Infected = number of infected premises at the beginning of a simulation, Prevalence = outcome of the Maximum Entropy Model and starting prevalence of the epidemiological model

| Region | PopSize | Density | Betamax County | Betamin County | Betamed County | Climate factor | Infected | Prevalence |
|--------|---------|---------|----------------|----------------|----------------|----------------|----------|------------|
| 1      | 570     | 0.428   | 0.067          | 0.056          | 0.065          | 0.869          | 212      | 37.2%      |
| 2      | 184     | 0.251   | 0.059          | 0.049          | 0.057          | 0.970          | 68       | 37.2%      |
| 3      | 362     | 0.204   | 0.056          | 0.046          | 0.054          | 0.995          | 163      | 45.1%      |
| 4      | 110     | 0.348   | 0.050          | 0.042          | 0.049          | 0.713          | 50       | 45.1%      |
| 5      | 1027    | 0.315   | 0.058          | 0.048          | 0.056          | 0.857          | 371      | 36.1%      |
| 6      | 640     | 0.531   | 0.092          | 0.076          | 0.088          | 1.081          | 315      | 49.2%      |
| 7      | 2169    | 0.644   | 0.082          | 0.068          | 0.079          | 0.893          | 1064     | 49.1%      |
| 8      | 1052    | 0.611   | 0.073          | 0.061          | 0.071          | 0.812          | 423      | 40.2%      |
| 9      | 1027    | 0.872   | 0.089          | 0.074          | 0.086          | 0.847          | 368      | 35.8%      |
| 10     | 2074    | 1.186   | 0.138          | 0.114          | 0.132          | 1.143          | 784      | 37.8%      |
| 11     | 972     | 1.499   | 0.143          | 0.119          | 0.138          | 1.074          | 536      | 55.1%      |
| 12     | 967     | 3.988   | 0.116          | 0.096          | 0.111          | 0.567          | 208      | 21.5%      |
| 13     | 268     | 0.876   | 0.068          | 0.056          | 0.065          | 0.644          | 106      | 39.5%      |
| 14     | 37      | 0.504   | 0.052          | 0.043          | 0.050          | 0.625          | 15       | 39.5%      |
| 15     | 518     | 1.742   | 0.203          | 0.168          | 0.195          | 1.425          | 263      | 50.8%      |
| 16     | 1414    | 1.832   | 0.178          | 0.148          | 0.171          | 1.225          | 735      | 52.0%      |
| 17     | 949     | 0.784   | 0.105          | 0.087          | 0.101          | 1.041          | 374      | 39.4%      |
| 18     | 582     | 0.401   | 0.063          | 0.053          | 0.061          | 0.841          | 147      | 25.3%      |
| 19     | 91      | 0.408   | 0.056          | 0.047          | 0.054          | 0.743          | 23       | 25.3%      |
| 20     | 1105    | 0.654   | 0.089          | 0.074          | 0.085          | 0.953          | 469      | 42.5%      |
| 21     | 793     | 0.931   | 0.153          | 0.127          | 0.148          | 1.415          | 287      | 36.2%      |
| 22     | 1336    | 1.560   | 0.118          | 0.098          | 0.114          | 0.863          | 552      | 41.3%      |
| 23     | 124     | 0.886   | 0.139          | 0.115          | 0.134          | 1.311          | 36       | 28.8%      |
| 24     | 161     | 0.967   | 0.083          | 0.070          | 0.081          | 0.761          | 46       | 28.8%      |
| 25     | 223     | 1.187   | 0.114          | 0.094          | 0.109          | 0.944          | 33       | 14.7%      |
| 26     | 237     | 1.619   | 0.103          | 0.086          | 0.100          | 0.751          | 78       | 32.9%      |
| 27     | 492     | 1.549   | 0.126          | 0.105          | 0.121          | 0.933          | 171      | 34.7%      |

Table S2: Sheep population by region defined for the epidemiological model for 1999-2014

| Region  | Sheep population in 1999 | Sheep population in 2014 | Change (1999-2014) |
|---------|--------------------------|--------------------------|--------------------|
| 1 + 2   | 7,561                    | 11,413                   | 50.9%              |
| 3 + 4   | 7,149                    | 10,387                   | 45.3%              |
| 5       | 12,029                   | 15,618                   | 29.8%              |
| 6       | 11,718                   | 11,573                   | -1.2%              |
| 7       | 29,280                   | 33,638                   | 14.9%              |
| 8       | 16,150                   | 17,125                   | 6.0%               |
| 9       | 15,925                   | 25,107                   | 57.7%              |
| 10      | 19,609                   | 24,968                   | 27.3%              |
| 11      | 13,328                   | 13,442                   | 0.9%               |
| 12      | 36,578                   | 31,543                   | -13.8%             |
| 13 + 14 | 14,375                   | 18,747                   | 30.4%              |
| 15      | 17,541                   | 16,319                   | -7.0%              |
| 16      | 34,048                   | 34,872                   | 2.4%               |
| 17      | 13,282                   | 18,693                   | 40.7%              |
| 18 + 19 | 11,810                   | 12,119                   | 2.6%               |
| 20      | 20,874                   | 28,849                   | 38.2%              |
| 21      | 12,381                   | 16,484                   | 33.1%              |
| 22      | 32,622                   | 31,373                   | -3.8%              |
| 23 + 24 | 9,765                    | 9,944                    | 1.8%               |
| 25      | 9,403                    | 8,737                    | -7.1%              |
| 26      | 17,412                   | 13,724                   | -21.2%             |
| 27      | 27,333                   | 19,741                   | -27.8%             |
| Total   | 390,173                  | 424,416                  | 8.8%               |

Table S3: Regression results for the Swiss sheep population predictions for 2014-2030 using the Seemingly Unrelated Regression model. Z-values provided in parenthesis. \*\*\* and \*\* indicate significance at 99% and 95% confidence level, respectively.

| Region  | $\alpha$           | $\beta$            | $R^2$ | ( $Chi^2$ ) |
|---------|--------------------|--------------------|-------|-------------|
| 1, 2*   | 6,896 (17.44)***   | 131.6 (3.22)***    | 0.39  | (10.37)***  |
| 3, 4*   | 7,420 (10.97)***   | -33.7 (-0.48)      | 0.01  | (-0.23)     |
| 5       | 10,639 (16.13)***  | 318.0 (4.66)***    | 0.58  | (21.74)***  |
| 6       | 10,155 (29.95)***  | 2.6 -0.08          | 0.00  | (-0.01)     |
| 7       | 21,950 (19.92)***  | 575.0 (5.05)***    | 0.61  | (25.47)***  |
| 8       | 13,601 (25.92)***  | 79.8 -1.47         | 0.12  | (-2.16)     |
| 9       | 14,092 (16.68)***  | 705.6 (8.07)***    | 0.80  | (65.2)***   |
| 10      | 17,074 (32.61)***  | 416.3 (7.69)***    | 0.79  | (59.11)***  |
| 11      | 10,587 (20.48)***  | 117.3 (2.19)**     | 0.23  | (4.81)**    |
| 12      | 36,284 (86.35)***  | -418.6 (-9.63)***  | 0.85  | (92.81)***  |
| 13, 14* | 13,364 (23.40)***  | 129.9 (2.2)**      | 0.23  | (4.83)**    |
| 15      | 18,266 (59.28)***  | -216.5 (-6.79)***  | 0.74  | (46.16)***  |
| 16      | 35,514 (53.16)***  | 37.3 -0.54         | 0.02  | (-0.29)     |
| 17      | 13,346 (18.82)***  | 324.4 (4.42)***    | 0.55  | (19.56)***  |
| 18, 19* | 10,729 (31.32)***  | 113.6 (3.21)***    | 0.39  | (10.28)***  |
| 20      | 22,045 (31.57)***  | 452.5 (6.27)***    | 0.71  | (39.27)***  |
| 21      | 11,184 (28.76)***  | 283.2 (7.04)***    | 0.76  | (49.57)***  |
| 22      | 34,647 (45.37)***  | -120.5 (-1.53)     | 0.13  | (-2.33)     |
| 23, 24* | 9,821 (52.38)***   | -44.5 (-2.29)**    | 0.25  | (5.27)**    |
| 25      | 10,041 (47.02)***  | -65.3 (-2.96)***   | 0.35  | (8.74)***   |
| 26      | 17,632 (82.55)***  | -299.6 (-13.57)*** | 0.92  | (184.01)*** |
| 27      | 27,726 (101.02)*** | -561.0 (-19.77)*** | 0.96  | (390.67)*** |

\*these regions were compiled for the regression analysis

Table S4: Farm size defined by number of sheep per farm (number of farms, and percentage in brackets) by region in Switzerland in 2014.

| Region  | Small (1-30)  | Medium (31-70) | Large (>70)   |
|---------|---------------|----------------|---------------|
| 1 + 2   | 391 (83.73%)  | 45 (9.64%)     | 31 (6.64%)    |
| 3 + 4   | 230 (80.14%)  | 30 (10.45%)    | 27 (9.41%)    |
| 5       | 504 (82.49%)  | 60 (9.82%)     | 47 (7.69%)    |
| 6       | 318 (78.33%)  | 58 (14.29%)    | 30 (7.39%)    |
| 7       | 1076 (82.14%) | 145 (11.07%)   | 89 (6.79%)    |
| 8       | 532 (78.35%)  | 99 (14.58%)    | 48 (7.07%)    |
| 9       | 609 (74.27%)  | 128 (15.61%)   | 83 (10.12%)   |
| 10      | 1194 (87.22%) | 120 (8.77%)    | 55 (4.02%)    |
| 11      | 415 (78.75%)  | 76 (14.42%)    | 36 (6.83%)    |
| 12      | 192 (31.95%)  | 293 (48.75%)   | 116 (19.3%)   |
| 13 + 14 | 94 (48.45%)   | 38 (19.59%)    | 62 (31.96%)   |
| 15      | 164 (51.9%)   | 76 (24.05%)    | 76 (24.05%)   |
| 16      | 514 (58.54%)  | 235 (26.77%)   | 129 (14.69%)  |
| 17      | 526 (78.51%)  | 77 (11.49%)    | 67 (10%)      |
| 18 + 19 | 375 (78.29%)  | 69 (14.41%)    | 35 (7.31%)    |
| 20      | 472 (69.82%)  | 114 (16.86%)   | 90 (13.31%)   |
| 21      | 451 (75.42%)  | 97 (16.22%)    | 50 (8.36%)    |
| 22      | 543 (65.58%)  | 176 (21.26%)   | 109 (13.16%)  |
| 23 + 24 | 109 (56.48%)  | 44 (22.8%)     | 40 (20.73%)   |
| 25      | 87 (50.29%)   | 47 (27.17%)    | 39 (22.54%)   |
| 26      | 46 (26.59%)   | 55 (31.79%)    | 72 (41.62%)   |
| 27      | 146 (42.2%)   | 117 (33.82%)   | 83 (23.99%)   |
| Total   | 8988 (71.33%) | 2199 (17.45%)  | 1414 (11.22%) |

Table S5: Predictions of future sheep farm population in Switzerland (2014 – 2030) using the Seemingly Unrelated Regression model. The values are yearly regression coefficients  $\beta$  using large farms (<70 animals) as reference level. Z-values provided in parenthesis. \*\*\* indicate significance at 99% confidence level.

| Variable                           | Small (1-30 sheep/farm) | Medium (31-70 sheep/farm) |
|------------------------------------|-------------------------|---------------------------|
| Trend                              | -0.0012 (-4.2)***       | -0.0017 (-7.14)***        |
| Region 1, 2 <sup>§</sup>           | 0.8514 (128.85)***      | 0.1204 (21.83)***         |
| Region 3, 4 <sup>§</sup>           | 0.7550 (114.27)***      | 0.1293 (23.44)***         |
| Region 5                           | 0.8336 (126.16)***      | 0.1263 (22.89)***         |
| Region 6                           | 0.8013 (121.27)***      | 0.1582 (28.67)***         |
| Region 7                           | 0.8496 (128.58)***      | 0.1231 (22.32)***         |
| Region 8                           | 0.8179 (123.79)***      | 0.1498 (27.15)***         |
| Region 9                           | 0.7768 (117.57)***      | 0.1739 (31.53)***         |
| Region 10                          | 0.9011 (136.38)***      | 0.0947 (17.17)***         |
| Region 11                          | 0.7990 (120.92)***      | 0.1689 (30.62)***         |
| Region 12                          | 0.3920 (59.33)***       | 0.5012 (90.86)***         |
| Region 13, 14 <sup>§</sup>         | 0.5020 (75.98)***       | 0.2453 (44.46)***         |
| Region 15                          | 0.4113 (62.25)***       | 0.3791 (68.71)***         |
| Region 16                          | 0.6351 (96.12)***       | 0.2728 (49.45)***         |
| Region 17                          | 0.8188 (123.92)***      | 0.1274 (23.09)***         |
| Region 18, 19 <sup>§</sup>         | 0.7632 (115.51)***      | 0.1680 (30.46)***         |
| Region 20                          | 0.7592 (114.9)***       | 0.1670 (30.27)***         |
| Region 21                          | 0.8057 (121.94)***      | 0.1648 (29.88)***         |
| Region 22                          | 0.6714 (101.62)***      | 0.2345 (42.51)***         |
| Region 23, 24 <sup>§</sup>         | 0.5859 (88.68)***       | 0.2862 (51.88)***         |
| Region 25                          | 0.5320 (80.51)***       | 0.3005 (54.46)***         |
| Region 26                          | 0.3106 (47.01)***       | 0.3669 (66.51)***         |
| Region 27                          | 0.4662 (70.56)***       | 0.3745 (67.89)***         |
| R <sup>2</sup> (Chi <sup>2</sup> ) | 0.9987 (280889.78)***   | 0.9922 (44586.29)***      |

<sup>§</sup>these regions were compiled for the regression analysis

Table S6: Prevalence of foot-rot for the four simulated scenarios A-D over the course of the simulation (57 years) [xls document]

The prevalence in region 24, 26 and 27 increased > 100% for scenario D. This was caused by the correction algorithm described in section 2.5 of the main text. The prevalence estimations of for these regions and time periods with values > 100% are not further usable. However, the correction algorithm does not influence the predictions of the national prevalence.
